# Supplementary material for: Human Host Defense Peptide LL-37 Stimulates Virulence Factor Production and Adaptive Resistance in Pseudomonas aeruginosa
Source: PubMed Central journal article supplement (PMC3862677; doi:10.1371/journal.pone.0082240), 2013-12-13
Supplement: pone.0082240.s002.pdf [file pone.0082240.s002.pdf]

**Table S1: qRT-PCR primers for detection of *P. aeruginosa* PAO1 gene expression**

| <b>PA number</b> | <b>Gene</b>  | <b>Forward primer</b>          | <b>Reverse primer</b>       |
|------------------|--------------|--------------------------------|-----------------------------|
| <b>PA4206</b>    | <i>mexH</i>  | TGG TGC AAC TCA ACG ACG C      | GCA TGG AGG ATC TCG GCA TT  |
| <b>PA1000</b>    | <i>pqsE</i>  | ATG ATG ACC TGT GCC TGT TG     | GTC GTA GTG CTT GTG GGT GA  |
| <b>PA4598</b>    | <i>mexD</i>  | ACC CGA AAT TCC TTT ACG CG     | ATG GTC TCG AAG CTC ACC CC  |
| <b>PA3724</b>    | <i>lasB</i>  | ATG AAC GAG GCG TTC TCC G      | GTT GTA CAC GCC GCT GGA GT  |
| <b>PA2194</b>    | <i>hcnB</i>  | AAC AAG CCG CAA CTG TTC CTC    | TTC CGT CAG TTC CCC ATC G   |
| <b>PA0576</b>    | <i>rpoD</i>  | GGG GAT CAA CGT ATT CGA GA     | CAG TTC CAC GGT ACC CAT TT  |
| <b>PA1901</b>    | <i>phzC2</i> | GGA TCC TCA AGG GCT ATG C      | GTG GGT CGA ACC GAG ATA GA  |
| <b>PA3556</b>    | <i>arnT</i>  | ATG TGG TGC AGA ACA AGA<br>CCC | CCG AGG TCA TTG CTC AGC A   |
| <b>PA4776</b>    | <i>pmrA</i>  | AAC CAA CTG GAG CAG AGC<br>CTC | ACG TGG ACT TCG ATG GCG T   |
| <b>PA1430</b>    | <i>lasR</i>  | TGC CTA AGG ACA GCC AGG<br>ACT | CCG AGG CTT CCT CGA AGA AC  |
| <b>PA3477</b>    | <i>rhlR</i>  | TGC GTT GCA TGA TCG ATT G      | CGC GTC GAA CTT CTT CTG GAT |
