# Supplementary material for: Human Host Defense Peptide LL-37 Stimulates Virulence Factor Production and Adaptive Resistance in Pseudomonas aeruginosa
Source: PubMed Central journal article supplement (PMC3862677; doi:10.1371/journal.pone.0082240), 2013-12-13
Supplement: pone.0082240.s003.pdf [file pone.0082240.s003.pdf]

**Table S2: Full list of upregulated genes (fold change  $\geq 1.5$ ) in response to 20  $\mu\text{g/ml}$  LL-37 compared to non-treated *P. aeruginosa* PAO1**

| <b>PA number</b> | <b>Gene name</b> | <b>Function class</b>                                                                                                           | <b>Fold change</b> |
|------------------|------------------|---------------------------------------------------------------------------------------------------------------------------------|--------------------|
| PA0035           | <i>trpA</i>      | Amino acid biosynthesis and metabolism                                                                                          | 1.5                |
| PA0050           |                  | Hypothetical, unclassified, unknown                                                                                             | 2.5                |
| PA0051           | <i>phzH</i>      | Putative enzymes                                                                                                                | 1.6                |
| PA0059           | <i>osmC</i>      | Adaptation, Protection                                                                                                          | 1.5                |
| PA0062           |                  | Hypothetical, unclassified, unknown                                                                                             | 1.6                |
| PA0074           | <i>ppkA</i>      | Adaptation, Protection; Translation, post-translational modification, degradation; Protein secretion/export apparatus           | 1.5                |
| PA0088           |                  | Protein secretion/export apparatus                                                                                              | 1.6                |
| PA0090           |                  | Translation, post-translational modification, degradation; Chaperones & heat shock proteins; Protein secretion/export apparatus | 1.9                |
| PA0091           |                  | Protein secretion/export apparatus                                                                                              | 1.9                |
| PA0098           |                  | Hypothetical, unclassified, unknown                                                                                             | 1.6                |
| PA0099           |                  | Hypothetical, unclassified, unknown                                                                                             | 1.6                |
| PA0102           |                  | Central intermediary metabolism                                                                                                 | 2.0                |
| PA0103           |                  | Membrane proteins; Transport of small molecules                                                                                 | 2.0                |
| PA0122           |                  | Adaptation, Protection                                                                                                          | 1.8                |
| PA0141           |                  | Hypothetical, unclassified, unknown                                                                                             | 1.5                |
| PA0169           |                  | Motility & Attachment                                                                                                           | 1.8                |
| PA0175           |                  | Transcriptional regulators; Adaptation, Protection; Chemotaxis                                                                  | 1.6                |
| PA0176           |                  | Adaptation, Protection; Chemotaxis                                                                                              | 1.5                |
| PA0177           |                  | Adaptation, Protection; Chemotaxis                                                                                              | 1.8                |

---

|               |              |                                                                                                     |     |
|---------------|--------------|-----------------------------------------------------------------------------------------------------|-----|
| <b>PA0187</b> |              | Hypothetical, unclassified, unknown                                                                 | 2.6 |
| <b>PA0269</b> |              | Hypothetical, unclassified, unknown                                                                 | 1.7 |
| <b>PA0320</b> |              | Hypothetical, unclassified, unknown                                                                 | 7.2 |
| <b>PA0327</b> |              | Hypothetical, unclassified, unknown                                                                 | 1.8 |
| <b>PA0429</b> |              | Hypothetical, unclassified, unknown                                                                 | 1.6 |
| <b>PA0430</b> | <i>metF</i>  | Amino acid biosynthesis and metabolism; Central intermediary metabolism                             | 2.0 |
| <b>PA0431</b> |              | Hypothetical, unclassified, unknown                                                                 | 1.9 |
| <b>PA0460</b> |              | Hypothetical, unclassified, unknown                                                                 | 1.5 |
| <b>PA0506</b> |              | Putative enzymes                                                                                    | 1.6 |
| <b>PA0546</b> | <i>metK</i>  | Amino acid biosynthesis and metabolism; Central intermediary metabolism                             | 3.2 |
| <b>PA0547</b> |              | Transcriptional regulators                                                                          | 3.1 |
| <b>PA0589</b> |              | Energy metabolism                                                                                   | 1.5 |
| <b>PA0635</b> |              | Related to phage, transposon, or plasmid                                                            | 1.5 |
| <b>PA0744</b> |              | Putative enzymes                                                                                    | 1.6 |
| <b>PA0779</b> |              | Putative enzymes                                                                                    | 1.9 |
| <b>PA0793</b> |              | Hypothetical, unclassified, unknown                                                                 | 1.9 |
| <b>PA0795</b> | <i>prpC</i>  | Central intermediary metabolism; Carbon compound catabolism                                         | 1.9 |
| <b>PA0796</b> | <i>prpB</i>  | Fatty acid and phospholipid metabolism; Central intermediary metabolism; Carbon compound catabolism | 2.5 |
| <b>PA0852</b> | <i>cbpD</i>  | Secreted Factors (toxins, enzymes, alginate)                                                        | 1.6 |
| <b>PA0853</b> |              | Putative enzymes                                                                                    | 1.5 |
| <b>PA0866</b> | <i>aroP2</i> | Transport of small molecules                                                                        | 1.7 |
| <b>PA0887</b> | <i>acsA</i>  | Carbon compound catabolism; Central intermediary metabolism                                         | 3.1 |
| <b>PA0938</b> |              | Hypothetical, unclassified, unknown                                                                 | 1.5 |

---

---

|               |             |                                                                   |     |
|---------------|-------------|-------------------------------------------------------------------|-----|
| <b>PA0996</b> | <i>pqsA</i> | Biosynthesis of cofactors, prosthetic groups and carriers         | 2.1 |
| <b>PA0997</b> | <i>pqsB</i> | Biosynthesis of cofactors, prosthetic groups and carriers         | 1.9 |
| <b>PA0998</b> | <i>pqsC</i> | Biosynthesis of cofactors, prosthetic groups and carriers         | 1.6 |
| <b>PA0999</b> | <i>pqsD</i> | Biosynthesis of cofactors, prosthetic groups and carriers         | 1.7 |
| <b>PA1000</b> | <i>pqsE</i> | Biosynthesis of cofactors, prosthetic groups and carriers         | 2.1 |
| <b>PA1001</b> | <i>phnA</i> | Adaptation, Protection                                            | 2.0 |
| <b>PA1002</b> | <i>phnB</i> | Amino acid biosynthesis and metabolism;<br>Adaptation, Protection | 2.2 |
| <b>PA1070</b> | <i>braG</i> | Transport of small molecules                                      | 1.8 |
| <b>PA1115</b> |             | Membrane proteins                                                 | 2.2 |
| <b>PA1119</b> |             | Membrane proteins; Cell wall / LPS / capsule                      | 1.5 |
| <b>PA1130</b> | <i>rhIC</i> | Cell wall / LPS / capsule; Adaptation, Protection                 | 2.2 |
| <b>PA1168</b> |             | Hypothetical, unclassified, unknown                               | 8.0 |
| <b>PA1169</b> |             | Putative enzymes                                                  | 4.7 |
| <b>PA1173</b> | <i>napB</i> | Energy metabolism                                                 | 1.8 |
| <b>PA1175</b> | <i>napD</i> | Energy metabolism                                                 | 2.0 |
| <b>PA1176</b> | <i>napF</i> | Energy metabolism                                                 | 1.5 |
| <b>PA1216</b> |             | Hypothetical, unclassified, unknown                               | 2.0 |
| <b>PA1217</b> |             | Amino acid biosynthesis and metabolism                            | 1.8 |
| <b>PA1323</b> |             | Hypothetical, unclassified, unknown                               | 1.5 |
| <b>PA1471</b> |             | Hypothetical, unclassified, unknown                               | 1.7 |
| <b>PA1478</b> |             | Hypothetical, unclassified, unknown                               | 2.0 |
| <b>PA1480</b> | <i>ccmF</i> | Energy metabolism                                                 | 1.6 |
| <b>PA1494</b> |             | Hypothetical, unclassified, unknown                               | 1.5 |

---

---

|               |             |                                                                                                         |     |
|---------------|-------------|---------------------------------------------------------------------------------------------------------|-----|
| <b>PA1550</b> |             | Hypothetical, unclassified, unknown                                                                     | 2.3 |
| <b>PA1551</b> |             | Energy metabolism                                                                                       | 2.0 |
| <b>PA1556</b> |             | Energy metabolism; Energy metabolism                                                                    | 1.7 |
| <b>PA1559</b> |             | Hypothetical, unclassified, unknown                                                                     | 7.9 |
| <b>PA1560</b> |             | Hypothetical, unclassified, unknown                                                                     | 3.4 |
| <b>PA1592</b> |             | Hypothetical, unclassified, unknown                                                                     | 1.5 |
| <b>PA1657</b> |             | Hypothetical, unclassified, unknown                                                                     | 3.5 |
| <b>PA1658</b> |             | Hypothetical, unclassified, unknown                                                                     | 2.8 |
| <b>PA1659</b> |             | Hypothetical, unclassified, unknown                                                                     | 2.3 |
| <b>PA1662</b> |             | Putative enzymes                                                                                        | 1.7 |
| <b>PA1664</b> |             | Hypothetical, unclassified, unknown                                                                     | 4.1 |
| <b>PA1665</b> |             | Hypothetical, unclassified, unknown                                                                     | 2.3 |
| <b>PA1666</b> |             | Hypothetical, unclassified, unknown                                                                     | 1.7 |
| <b>PA1667</b> |             | Hypothetical, unclassified, unknown                                                                     | 2.3 |
| <b>PA1668</b> |             | Hypothetical, unclassified, unknown                                                                     | 1.5 |
| <b>PA1760</b> |             | Transcriptional regulators                                                                              | 1.5 |
| <b>PA1797</b> |             | Hypothetical, unclassified, unknown                                                                     | 2.9 |
| <b>PA1812</b> | <i>mltD</i> | Amino acid biosynthesis and metabolism; Cell wall / LPS / capsule                                       | 1.7 |
| <b>PA1852</b> |             | Hypothetical, unclassified, unknown                                                                     | 2.0 |
| <b>PA1869</b> |             | Fatty acid and phospholipid metabolism                                                                  | 2.5 |
| <b>PA1871</b> | <i>lasA</i> | Secreted Factors (toxins, enzymes, alginate); Translation, post-translational modification, degradation | 1.8 |
| <b>PA1887</b> |             | Hypothetical, unclassified, unknown                                                                     | 1.5 |
| <b>PA1888</b> |             | Hypothetical, unclassified, unknown                                                                     | 1.7 |
| <b>PA1894</b> |             | Hypothetical, unclassified, unknown                                                                     | 1.6 |
| <b>PA1895</b> |             | Membrane proteins                                                                                       | 1.5 |

---

---

|               |              |                                                 |     |
|---------------|--------------|-------------------------------------------------|-----|
| <b>PA1901</b> | <i>phzC2</i> | Secreted Factors (toxins, enzymes, alginate)    | 4.7 |
| <b>PA1902</b> | <i>phzD2</i> | Secreted Factors (toxins, enzymes, alginate)    | 5.8 |
| <b>PA1903</b> | <i>phzE2</i> | Secreted Factors (toxins, enzymes, alginate)    | 6.1 |
| <b>PA1904</b> | <i>phzF2</i> | Secreted Factors (toxins, enzymes, alginate)    | 6.0 |
| <b>PA1905</b> | <i>phzG2</i> | Secreted Factors (toxins, enzymes, alginate)    | 6.3 |
| <b>PA1930</b> |              | Adaptation, Protection; Chemotaxis              | 1.5 |
| <b>PA1969</b> |              | Hypothetical, unclassified, unknown             | 1.6 |
| <b>PA2003</b> | <i>bdhA</i>  | Carbon compound catabolism                      | 1.7 |
| <b>PA2011</b> | <i>gnyL</i>  | Carbon compound catabolism                      | 1.6 |
| <b>PA2012</b> | <i>gnyA</i>  | Carbon compound catabolism                      | 3.5 |
| <b>PA2013</b> | <i>gnyH</i>  | Carbon compound catabolism                      | 4.0 |
| <b>PA2014</b> | <i>gnyB</i>  | Carbon compound catabolism                      | 3.8 |
| <b>PA2015</b> | <i>gnyD</i>  | Carbon compound catabolism                      | 3.1 |
| <b>PA2016</b> | <i>gnyR</i>  | Transcriptional regulators                      | 3.6 |
| <b>PA2030</b> |              | Hypothetical, unclassified, unknown             | 2.5 |
| <b>PA2031</b> |              | Hypothetical, unclassified, unknown             | 2.4 |
| <b>PA2066</b> |              | Hypothetical, unclassified, unknown             | 2.1 |
| <b>PA2067</b> |              | Putative enzymes                                | 2.3 |
| <b>PA2068</b> |              | Membrane proteins; Transport of small molecules | 6.1 |
| <b>PA2069</b> |              | Putative enzymes                                | 6.8 |
| <b>PA2109</b> |              | Hypothetical, unclassified, unknown             | 1.7 |
| <b>PA2110</b> |              | Hypothetical, unclassified, unknown             | 1.6 |
| <b>PA2112</b> |              | Hypothetical, unclassified, unknown             | 1.7 |
| <b>PA2166</b> |              | Hypothetical, unclassified, unknown             | 1.7 |
| <b>PA2171</b> |              | Hypothetical, unclassified, unknown             | 2.0 |
| <b>PA2193</b> | <i>hcnA</i>  | Central intermediary metabolism                 | 2.4 |

---

---

|               |             |                                                                             |     |
|---------------|-------------|-----------------------------------------------------------------------------|-----|
| <b>PA2194</b> | <i>hcnB</i> | Central intermediary metabolism                                             | 2.6 |
| <b>PA2195</b> | <i>hcnC</i> | Central intermediary metabolism                                             | 2.1 |
| <b>PA2274</b> |             | Hypothetical, unclassified, unknown                                         | 1.9 |
| <b>PA2290</b> | <i>gcd</i>  | Carbon compound catabolism; Energy metabolism                               | 1.6 |
| <b>PA2300</b> | <i>chiC</i> | Carbon compound catabolism                                                  | 5.0 |
| <b>PA2302</b> |             | Secreted Factors (toxins, enzymes, alginate);<br>Putative enzymes           | 1.7 |
| <b>PA2303</b> |             | Secreted Factors (toxins, enzymes, alginate)                                | 2.0 |
| <b>PA2358</b> |             | Hypothetical, unclassified, unknown                                         | 5.2 |
| <b>PA2366</b> |             | Hypothetical, unclassified, unknown                                         | 2.1 |
| <b>PA2367</b> |             | Hypothetical, unclassified, unknown                                         | 2.1 |
| <b>PA2368</b> |             | Hypothetical, unclassified, unknown                                         | 2.3 |
| <b>PA2433</b> |             | Hypothetical, unclassified, unknown                                         | 2.3 |
| <b>PA2441</b> |             | Hypothetical, unclassified, unknown                                         | 1.6 |
| <b>PA2485</b> |             | Hypothetical, unclassified, unknown                                         | 1.6 |
| <b>PA2486</b> |             | Hypothetical, unclassified, unknown                                         | 1.7 |
| <b>PA2552</b> |             | Putative enzymes                                                            | 1.9 |
| <b>PA2553</b> |             | Putative enzymes                                                            | 1.9 |
| <b>PA2554</b> |             | Putative enzymes                                                            | 2.3 |
| <b>PA2555</b> |             | Putative enzymes                                                            | 1.6 |
| <b>PA2557</b> |             | Fatty acid and phospholipid metabolism                                      | 3.0 |
| <b>PA2562</b> |             | Hypothetical, unclassified, unknown                                         | 1.9 |
| <b>PA2566</b> |             | Hypothetical, unclassified, unknown                                         | 2.0 |
| <b>PA2570</b> | <i>pa1L</i> | Adaptation, Protection; Motility & Attachment; Cell<br>wall / LPS / capsule | 1.6 |
| <b>PA2572</b> |             | Transcriptional regulators; Two-component<br>regulatory systems             | 1.5 |
| <b>PA2588</b> |             | Transcriptional regulators                                                  | 1.5 |

---

---

|               |              |                                                                                             |     |
|---------------|--------------|---------------------------------------------------------------------------------------------|-----|
| <b>PA2607</b> |              | Hypothetical, unclassified, unknown                                                         | 1.5 |
| <b>PA2642</b> | <i>nuoG</i>  | Energy metabolism                                                                           | 1.6 |
| <b>PA2643</b> | <i>nuoH</i>  | Energy metabolism                                                                           | 1.6 |
| <b>PA2646</b> | <i>nuoK</i>  | Energy metabolism                                                                           | 1.5 |
| <b>PA2647</b> | <i>nuoL</i>  | Energy metabolism                                                                           | 1.6 |
| <b>PA2655</b> |              | Hypothetical, unclassified, unknown                                                         | 1.6 |
| <b>PA2717</b> | <i>cpo</i>   | Central intermediary metabolism                                                             | 1.5 |
| <b>PA2754</b> |              | Hypothetical, unclassified, unknown                                                         | 1.7 |
| <b>PA2788</b> |              | Adaptation, Protection; Chemotaxis                                                          | 2.1 |
| <b>PA2895</b> |              | Hypothetical, unclassified, unknown                                                         | 1.6 |
| <b>PA3028</b> | <i>moeA2</i> | Biosynthesis of cofactors, prosthetic groups and carriers                                   | 1.5 |
| <b>PA3038</b> |              | Transport of small molecules                                                                | 2.2 |
| <b>PA3049</b> | <i>rmf</i>   | Translation, post-translational modification, degradation                                   | 1.7 |
| <b>PA3126</b> | <i>ibpA</i>  | Chaperones & heat shock proteins                                                            | 2.1 |
| <b>PA3149</b> | <i>wbpH</i>  | Putative enzymes; Cell wall / LPS / capsule                                                 | 1.6 |
| <b>PA3213</b> |              | Hypothetical, unclassified, unknown                                                         | 1.6 |
| <b>PA3214</b> |              | Hypothetical, unclassified, unknown                                                         | 1.5 |
| <b>PA3234</b> |              | Membrane proteins; Transport of small molecules                                             | 1.8 |
| <b>PA3235</b> |              | Membrane proteins                                                                           | 1.6 |
| <b>PA3361</b> | <i>lecB</i>  | Motility & Attachment                                                                       | 5.9 |
| <b>PA3478</b> | <i>rhIB</i>  | Secreted Factors (toxins, enzymes, alginate)                                                | 2.0 |
| <b>PA3479</b> | <i>rhIA</i>  | Secreted Factors (toxins, enzymes, alginate)                                                | 1.5 |
| <b>PA3520</b> |              | Hypothetical, unclassified, unknown                                                         | 1.6 |
| <b>PA3530</b> |              | Hypothetical, unclassified, unknown                                                         | 1.9 |
| <b>PA3552</b> | <i>arnB</i>  | Cell wall / LPS / capsule; Antibiotic resistance and susceptibility; Adaptation, Protection | 1.6 |

---

---

|               |             |                                                                                                               |     |
|---------------|-------------|---------------------------------------------------------------------------------------------------------------|-----|
| <b>PA3553</b> | <i>arnC</i> | Adaptation, Protection; Putative enzymes; Cell wall / LPS / capsule; Antibiotic resistance and susceptibility | 1.6 |
| <b>PA3555</b> | <i>arnD</i> | Adaptation, Protection; Antibiotic resistance and susceptibility; Cell wall / LPS / capsule                   | 1.5 |
| <b>PA3556</b> | <i>arnT</i> | Adaptation, Protection; Membrane proteins; Cell wall / LPS / capsule                                          | 2.0 |
| <b>PA3557</b> | <i>arnE</i> | Adaptation, Protection; Cell wall / LPS / capsule; Membrane proteins                                          | 2.0 |
| <b>PA3558</b> | <i>arnF</i> | Membrane proteins; Adaptation, Protection; Cell wall / LPS / capsule                                          | 2.2 |
| <b>PA3559</b> | <i>ugd</i>  | Putative enzymes                                                                                              | 2.8 |
| <b>PA3569</b> | <i>mmsB</i> | Carbon compound catabolism                                                                                    | 2.3 |
| <b>PA3570</b> | <i>mmsA</i> | Amino acid biosynthesis and metabolism; Carbon compound catabolism                                            | 2.6 |
| <b>PA3642</b> | <i>rnhB</i> | DNA replication, recombination, modification and repair                                                       | 1.5 |
| <b>PA3643</b> | <i>lpxB</i> | Cell wall / LPS / capsule                                                                                     | 1.5 |
| <b>PA3659</b> |             | Putative enzymes                                                                                              | 1.6 |
| <b>PA3661</b> |             | Hypothetical, unclassified, unknown                                                                           | 3.5 |
| <b>PA3676</b> |             | Membrane proteins; Transport of small molecules                                                               | 1.6 |
| <b>PA3677</b> |             | Transport of small molecules                                                                                  | 1.7 |
| <b>PA3678</b> |             | Transcriptional regulators                                                                                    | 1.7 |
| <b>PA3719</b> |             | Antibiotic resistance and susceptibility                                                                      | 2.0 |
| <b>PA3720</b> |             | Hypothetical, unclassified, unknown                                                                           | 2.6 |
| <b>PA3724</b> | <i>lasB</i> | Secreted Factors (toxins, enzymes, alginate); Translation, post-translational modification, degradation       | 2.1 |
| <b>PA3733</b> |             | Hypothetical, unclassified, unknown                                                                           | 1.5 |
| <b>PA3734</b> |             | Hypothetical, unclassified, unknown                                                                           | 1.8 |
| <b>PA3784</b> |             | Hypothetical, unclassified, unknown                                                                           | 2.3 |

---



---

|               |             |                                                           |      |
|---------------|-------------|-----------------------------------------------------------|------|
| <b>PA3785</b> |             | Hypothetical, unclassified, unknown                       | 2.5  |
| <b>PA3786</b> |             | Hypothetical, unclassified, unknown                       | 1.9  |
| <b>PA3809</b> | <i>fdx2</i> | Energy metabolism                                         | 1.6  |
| <b>PA3810</b> | <i>hscA</i> | Chaperones & heat shock proteins                          | 1.5  |
| <b>PA3901</b> | <i>fecA</i> | Membrane proteins; Transport of small molecules           | 2.4  |
| <b>PA3905</b> |             | Hypothetical, unclassified, unknown                       | 2.0  |
| <b>PA3906</b> |             | Hypothetical, unclassified, unknown                       | 2.1  |
| <b>PA3907</b> |             | Hypothetical, unclassified, unknown                       | 1.7  |
| <b>PA3908</b> |             | Hypothetical, unclassified, unknown                       | 1.9  |
| <b>PA3919</b> |             | Hypothetical, unclassified, unknown                       | 1.7  |
| <b>PA3981</b> |             | Hypothetical, unclassified, unknown                       | 1.8  |
| <b>PA3982</b> |             | Hypothetical, unclassified, unknown                       | 1.6  |
| <b>PA3996</b> | <i>lis</i>  | Biosynthesis of cofactors, prosthetic groups and carriers | 2.0  |
| <b>PA4067</b> | <i>oprG</i> | Membrane proteins                                         | 1.6  |
| <b>PA4129</b> |             | Hypothetical, unclassified, unknown                       | 3.1  |
| <b>PA4130</b> |             | Central intermediary metabolism                           | 2.3  |
| <b>PA4131</b> |             | Putative enzymes                                          | 2.5  |
| <b>PA4132</b> |             | Hypothetical, unclassified, unknown                       | 2.9  |
| <b>PA4133</b> |             | Energy metabolism                                         | 3.7  |
| <b>PA4134</b> |             | Hypothetical, unclassified, unknown                       | 5.4  |
| <b>PA4139</b> |             | Hypothetical, unclassified, unknown                       | 9.6  |
| <b>PA4140</b> |             | Hypothetical, unclassified, unknown                       | 2.6  |
| <b>PA4141</b> |             | Hypothetical, unclassified, unknown                       | 3.2  |
| <b>PA4142</b> |             | Protein secretion/export apparatus                        | 1.5  |
| <b>PA4205</b> | <i>mexG</i> | Membrane proteins                                         | 10.2 |
| <b>PA4206</b> | <i>mexH</i> | Transport of small molecules                              | 4.9  |

---

---

|               |              |                                                                                              |     |
|---------------|--------------|----------------------------------------------------------------------------------------------|-----|
| <b>PA4207</b> | <i>mexI</i>  | Membrane proteins; Transport of small molecules                                              | 2.5 |
| <b>PA4208</b> | <i>opmD</i>  | Membrane proteins; Transport of small molecules                                              | 3.1 |
| <b>PA4209</b> | <i>phzM</i>  | Putative enzymes                                                                             | 5.3 |
| <b>PA4210</b> | <i>phzA1</i> | Secreted Factors (toxins, enzymes, alginate)                                                 | 7.8 |
| <b>PA4211</b> | <i>phzB1</i> | Secreted Factors (toxins, enzymes, alginate)                                                 | 4.5 |
| <b>PA4217</b> | <i>phzS</i>  | Putative enzymes                                                                             | 5.3 |
| <b>PA4221</b> | <i>fptA</i>  | Transport of small molecules                                                                 | 1.7 |
| <b>PA4228</b> | <i>pchD</i>  | Secreted Factors (toxins, enzymes, alginate);<br>Transport of small molecules                | 1.6 |
| <b>PA4229</b> | <i>pchC</i>  | Secreted Factors (toxins, enzymes, alginate);<br>Transport of small molecules                | 1.7 |
| <b>PA4230</b> | <i>pchB</i>  | Secreted Factors (toxins, enzymes, alginate);<br>Transport of small molecules                | 1.8 |
| <b>PA4231</b> | <i>pchA</i>  | Secreted Factors (toxins, enzymes, alginate);<br>Transport of small molecules                | 1.5 |
| <b>PA4290</b> |              | Adaptation, Protection; Chemotaxis                                                           | 1.6 |
| <b>PA4306</b> |              | Motility & Attachment                                                                        | 2.0 |
| <b>PA4359</b> |              | Hypothetical, unclassified, unknown                                                          | 1.6 |
| <b>PA4428</b> | <i>sspA</i>  | Adaptation, Protection                                                                       | 1.6 |
| <b>PA4430</b> |              | Energy metabolism                                                                            | 1.5 |
| <b>PA4489</b> |              | Hypothetical, unclassified, unknown                                                          | 2.0 |
| <b>PA4490</b> |              | Hypothetical, unclassified, unknown                                                          | 1.5 |
| <b>PA4515</b> |              | Hypothetical, unclassified, unknown                                                          | 2.7 |
| <b>PA4525</b> | <i>pilA</i>  | Motility & Attachment                                                                        | 1.6 |
| <b>PA4573</b> |              | Hypothetical, unclassified, unknown                                                          | 1.5 |
| <b>PA4597</b> | <i>oprJ</i>  | Membrane proteins; Antibiotic resistance and<br>susceptibility; Transport of small molecules | 3.9 |
| <b>PA4598</b> | <i>mexD</i>  | Transport of small molecules; Membrane proteins;<br>Antibiotic resistance and susceptibility | 4.4 |

---

---

|               |             |                                                                                                 |     |
|---------------|-------------|-------------------------------------------------------------------------------------------------|-----|
| <b>PA4599</b> | <i>mexC</i> | Transport of small molecules; Antibiotic resistance and susceptibility                          | 9.1 |
| <b>PA4600</b> | <i>nfxB</i> | Transcriptional regulators                                                                      | 1.9 |
| <b>PA4611</b> |             | Hypothetical, unclassified, unknown                                                             | 1.6 |
| <b>PA4624</b> |             | Cell wall / LPS / capsule                                                                       | 1.9 |
| <b>PA4625</b> |             | Secreted Factors (toxins, enzymes, alginate); Cell wall / LPS / capsule                         | 3.0 |
| <b>PA4675</b> |             | Transport of small molecules                                                                    | 1.9 |
| <b>PA4700</b> | <i>mrcB</i> | Cell wall / LPS / capsule                                                                       | 1.5 |
| <b>PA4757</b> |             | Membrane proteins                                                                               | 1.8 |
| <b>PA4758</b> | <i>carA</i> | Amino acid biosynthesis and metabolism; Nucleotide biosynthesis and metabolism                  | 1.6 |
| <b>PA4773</b> |             | Hypothetical, unclassified, unknown                                                             | 4.9 |
| <b>PA4774</b> |             | Hypothetical, unclassified, unknown                                                             | 3.2 |
| <b>PA4775</b> |             | Hypothetical, unclassified, unknown                                                             | 2.2 |
| <b>PA4776</b> | <i>pmrA</i> | Two-component regulatory systems                                                                | 1.9 |
| <b>PA4782</b> |             | Hypothetical, unclassified, unknown                                                             | 1.5 |
| <b>PA4865</b> | <i>ureA</i> | Central intermediary metabolism                                                                 | 2.3 |
| <b>PA4925</b> |             | Hypothetical, unclassified, unknown                                                             | 1.7 |
| <b>PA4946</b> | <i>mutL</i> | DNA replication, recombination, modification and repair                                         | 1.7 |
| <b>PA4953</b> | <i>motB</i> | Membrane proteins; Adaptation, Protection; Chemotaxis                                           | 1.5 |
| <b>PA4961</b> |             | Membrane proteins                                                                               | 1.7 |
| <b>PA4997</b> | <i>msbA</i> | Fatty acid and phospholipid metabolism; Cell wall / LPS / capsule; Transport of small molecules | 1.7 |
| <b>PA5070</b> | <i>tatC</i> | Membrane proteins; Transport of small molecules                                                 | 1.6 |
| <b>PA5182</b> |             | Membrane proteins                                                                               | 2.2 |
| <b>PA5183</b> |             | Membrane proteins                                                                               | 2.7 |

---

---

|               |             |                                                                   |     |
|---------------|-------------|-------------------------------------------------------------------|-----|
| <b>PA5217</b> |             | Transport of small molecules                                      | 2.0 |
| <b>PA5220</b> |             | Hypothetical, unclassified, unknown                               | 2.0 |
| <b>PA5278</b> | <i>dapF</i> | Amino acid biosynthesis and metabolism                            | 1.9 |
| <b>PA5314</b> |             | Hypothetical, unclassified, unknown                               | 1.6 |
| <b>PA5323</b> | <i>argB</i> | Amino acid biosynthesis and metabolism                            | 1.5 |
| <b>PA5338</b> | <i>spoT</i> | Nucleotide biosynthesis and metabolism;<br>Adaptation, Protection | 1.5 |
| <b>PA5339</b> |             | Hypothetical, unclassified, unknown                               | 2.7 |
| <b>PA5340</b> |             | Hypothetical, unclassified, unknown                               | 1.6 |
| <b>PA5362</b> |             | Hypothetical, unclassified, unknown                               | 1.5 |
| <b>PA5445</b> |             | Putative enzymes                                                  | 1.9 |
| <b>PA5473</b> |             | Membrane proteins                                                 | 1.5 |
| <b>PA5475</b> |             | Hypothetical, unclassified, unknown                               | 1.7 |
| <b>PA5496</b> |             | Nucleotide biosynthesis and metabolism                            | 1.8 |
| <b>PA5497</b> |             | Nucleotide biosynthesis and metabolism                            | 1.9 |
| <b>PA5526</b> |             | Hypothetical, unclassified, unknown                               | 1.6 |
| <b>PA5531</b> | <i>tonB</i> | Transport of small molecules                                      | 2.0 |

---
