# Supplementary material for: Human Host Defense Peptide LL-37 Stimulates Virulence Factor Production and Adaptive Resistance in Pseudomonas aeruginosa
Source: PubMed Central journal article supplement (PMC3862677; doi:10.1371/journal.pone.0082240), 2013-12-13
Supplement: pone.0082240.s004.pdf [file pone.0082240.s004.pdf]

**Table S3: Full list of downregulated genes (fold change  $\geq 1.5$ ) in response to 20  $\mu\text{g/ml}$  LL-37 compared to non-treated *P. aeruginosa* PAO1**

| PA number | Gene name    | Function class                                  | Fold change |
|-----------|--------------|-------------------------------------------------|-------------|
| PA0026    | <i>plcB</i>  | Hypothetical, unclassified, unknown             | -1.9        |
| PA0115    |              | Hypothetical, unclassified, unknown             | -1.5        |
| PA0277    |              | Hypothetical, unclassified, unknown             | -1.7        |
| PA0347    | <i>glpQ</i>  | Fatty acid and phospholipid metabolism          | -3.6        |
| PA0450    |              | Membrane proteins; Transport of small molecules | -1.5        |
| PA0603    |              | Transport of small molecules                    | -2.2        |
| PA0604    |              | Transport of small molecules                    | -2.4        |
| PA0605    |              | Membrane proteins; Transport of small molecules | -2.6        |
| PA0606    |              | Membrane proteins; Transport of small molecules | -1.8        |
| PA0674    |              | Transcriptional regulators                      | -5.1        |
| PA0675    |              | Transcriptional regulators                      | -3.4        |
| PA0676    |              | Membrane proteins; Transcriptional regulators   | -1.9        |
| PA0679    |              | Hypothetical, unclassified, unknown             | -2.1        |
| PA0681    |              | Protein secretion/export apparatus              | -2.3        |
| PA0682    |              | Protein secretion/export apparatus              | -1.7        |
| PA0683    |              | Protein secretion/export apparatus              | -1.5        |
| PA0685    |              | Protein secretion/export apparatus              | -2.2        |
| PA0688    |              | Transport of small molecules                    | -2.8        |
| PA0691    |              | Hypothetical, unclassified, unknown             | -6.0        |
| PA0692    |              | Hypothetical, unclassified, unknown             | -3.0        |
| PA0693    | <i>exbB2</i> | Membrane proteins; Transport of small molecules | -6.4        |
| PA0694    | <i>exbD2</i> | Membrane proteins; Transport of small molecules | -2.2        |

---

|               |              |                                                                                                   |      |
|---------------|--------------|---------------------------------------------------------------------------------------------------|------|
| <b>PA0696</b> |              | Hypothetical, unclassified, unknown                                                               | -3.6 |
| <b>PA0697</b> |              | Hypothetical, unclassified, unknown                                                               | -2.4 |
| <b>PA0698</b> |              | Hypothetical, unclassified, unknown                                                               | -2.6 |
| <b>PA0730</b> |              | Putative enzymes                                                                                  | -2.3 |
| <b>PA0750</b> | <i>ung</i>   | DNA replication, recombination, modification and repair                                           | -1.5 |
| <b>PA0775</b> |              | Hypothetical, unclassified, unknown                                                               | -1.6 |
| <b>PA0842</b> |              | Putative enzymes                                                                                  | -2.9 |
| <b>PA0975</b> |              | Putative enzymes                                                                                  | -1.5 |
| <b>PA0979</b> |              | Related to phage, transposon, or plasmid                                                          | -2.0 |
| <b>PA1004</b> | <i>nadA</i>  | Amino acid biosynthesis and metabolism; Biosynthesis of cofactors, prosthetic groups and carriers | -1.5 |
| <b>PA1014</b> |              | Putative enzymes                                                                                  | -1.5 |
| <b>PA1051</b> |              | Membrane proteins; Transport of small molecules                                                   | -3.3 |
| <b>PA1052</b> |              | Hypothetical, unclassified, unknown                                                               | -1.7 |
| <b>PA1078</b> | <i>flgC</i>  | Cell wall / LPS / capsule; Motility & Attachment                                                  | -1.5 |
| <b>PA1081</b> | <i>flgF</i>  | Cell wall / LPS / capsule; Motility & Attachment                                                  | -1.5 |
| <b>PA1082</b> | <i>flgG</i>  | Cell wall / LPS / capsule; Motility & Attachment                                                  | -1.6 |
| <b>PA1083</b> | <i>flgH</i>  | Cell wall / LPS / capsule; Motility & Attachment                                                  | -1.5 |
| <b>PA1116</b> |              | Hypothetical, unclassified, unknown                                                               | -2.5 |
| <b>PA1134</b> |              | Hypothetical, unclassified, unknown                                                               | -1.7 |
| <b>PA1190</b> |              | Membrane proteins                                                                                 | -2.8 |
| <b>PA1225</b> |              | Putative enzymes                                                                                  | -1.5 |
| <b>PA1299</b> |              | Hypothetical, unclassified, unknown                                                               | -1.5 |
| <b>PA1325</b> |              | Hypothetical, unclassified, unknown                                                               | -1.5 |
| <b>PA1326</b> | <i>ilvA2</i> | Amino acid biosynthesis and metabolism                                                            | -1.5 |
| <b>PA1327</b> |              | Putative enzymes                                                                                  | -1.5 |

---

---

|               |             |                                                                 |      |
|---------------|-------------|-----------------------------------------------------------------|------|
| <b>PA1383</b> |             | Hypothetical, unclassified, unknown                             | -1.6 |
| <b>PA1606</b> |             | Hypothetical, unclassified, unknown                             | -4.9 |
| <b>PA1607</b> |             | Hypothetical, unclassified, unknown                             | -1.6 |
| <b>PA1632</b> | <i>kdpF</i> | Transport of small molecules                                    | -2.1 |
| <b>PA1633</b> | <i>kdpA</i> | Transport of small molecules                                    | -2.6 |
| <b>PA1634</b> | <i>kdpB</i> | Transport of small molecules                                    | -2.2 |
| <b>PA1635</b> | <i>kdpC</i> | Transport of small molecules                                    | -2.0 |
| <b>PA1636</b> | <i>kdpD</i> | Two-component regulatory systems                                | -2.0 |
| <b>PA1654</b> |             | Putative enzymes                                                | -1.5 |
| <b>PA1706</b> | <i>pcrV</i> | Protein secretion/export apparatus                              | -1.5 |
| <b>PA1839</b> |             | Hypothetical, unclassified, unknown                             | -1.5 |
| <b>PA1863</b> | <i>modA</i> | Transport of small molecules                                    | -1.6 |
| <b>PA1882</b> |             | Membrane proteins; Transport of small molecules                 | -1.6 |
| <b>PA1913</b> |             | Hypothetical, unclassified, unknown                             | -1.6 |
| <b>PA2022</b> |             | Putative enzymes                                                | -2.7 |
| <b>PA2203</b> |             | Membrane proteins; Transport of small molecules                 | -1.6 |
| <b>PA2306</b> |             | Membrane proteins; Secreted Factors (toxins, enzymes, alginate) | -1.7 |
| <b>PA2381</b> |             | Hypothetical, unclassified, unknown                             | -1.6 |
| <b>PA2427</b> |             | Hypothetical, unclassified, unknown                             | -2.3 |
| <b>PA2428</b> |             | Hypothetical, unclassified, unknown                             | -3.1 |
| <b>PA2548</b> |             | Hypothetical, unclassified, unknown                             | -3.8 |
| <b>PA2635</b> |             | Hypothetical, unclassified, unknown                             | -5.5 |
| <b>PA2654</b> |             | Adaptation, Protection; Chemotaxis                              | -1.9 |
| <b>PA2803</b> |             | Hypothetical, unclassified, unknown                             | -3.2 |
| <b>PA2804</b> |             | Hypothetical, unclassified, unknown                             | -3.5 |
| <b>PA2850</b> | <i>ohr</i>  | Adaptation, Protection                                          | -2.0 |

---

---

|               |             |                                                              |      |
|---------------|-------------|--------------------------------------------------------------|------|
| <b>PA2880</b> |             | Hypothetical, unclassified, unknown                          | -1.5 |
| <b>PA2881</b> |             | Transcriptional regulators; Two-component regulatory systems | -4.8 |
| <b>PA2882</b> |             | Two-component regulatory systems                             | -3.1 |
| <b>PA3116</b> |             | Amino acid biosynthesis and metabolism                       | -1.6 |
| <b>PA3120</b> | <i>leuD</i> | Amino acid biosynthesis and metabolism                       | -1.6 |
| <b>PA3219</b> |             | Hypothetical, unclassified, unknown                          | -5.3 |
| <b>PA3250</b> |             | Hypothetical, unclassified, unknown                          | -1.6 |
| <b>PA3251</b> |             | Hypothetical, unclassified, unknown                          | -1.6 |
| <b>PA3258</b> |             | Hypothetical, unclassified, unknown                          | -4.8 |
| <b>PA3278</b> |             | Membrane proteins                                            | -1.8 |
| <b>PA3279</b> | <i>oprP</i> | Transport of small molecules                                 | -5.5 |
| <b>PA3280</b> | <i>oprO</i> | Transport of small molecules                                 | -8.2 |
| <b>PA3296</b> | <i>phoA</i> | Central intermediary metabolism                              | -6.7 |
| <b>PA3319</b> | <i>plcN</i> | Secreted Factors (toxins, enzymes, alginate)                 | -5.9 |
| <b>PA3368</b> |             | Putative enzymes                                             | -2.8 |
| <b>PA3371</b> |             | Hypothetical, unclassified, unknown                          | -1.6 |
| <b>PA3374</b> |             | Transport of small molecules                                 | -1.6 |
| <b>PA3375</b> |             | Transport of small molecules                                 | -2.0 |
| <b>PA3376</b> |             | Transport of small molecules                                 | -1.7 |
| <b>PA3377</b> |             | Transport of small molecules                                 | -2.3 |
| <b>PA3378</b> |             | Transport of small molecules                                 | -2.7 |
| <b>PA3379</b> |             | Transport of small molecules                                 | -2.6 |
| <b>PA3380</b> |             | Transport of small molecules                                 | -2.8 |
| <b>PA3381</b> |             | Transcriptional regulators                                   | -3.5 |
| <b>PA3382</b> | <i>phnE</i> | Membrane proteins; Transport of small molecules              | -8.3 |
| <b>PA3383</b> |             | Transport of small molecules                                 | -7.6 |

---

---

|               |             |                                                                                                   |       |
|---------------|-------------|---------------------------------------------------------------------------------------------------|-------|
| <b>PA3384</b> | <i>phnC</i> | Transport of small molecules                                                                      | -7.9  |
| <b>PA3432</b> |             | Membrane proteins                                                                                 | -1.6  |
| <b>PA3436</b> |             | Hypothetical, unclassified, unknown                                                               | -1.9  |
| <b>PA3443</b> |             | Membrane proteins; Transport of small molecules                                                   | -1.6  |
| <b>PA3531</b> | <i>bfrB</i> | Transport of small molecules; Adaptation, Protection                                              | -1.9  |
| <b>PA3841</b> | <i>exoS</i> | Secreted Factors (toxins, enzymes, alginate)                                                      | -1.6  |
| <b>PA3909</b> |             | Hypothetical, unclassified, unknown                                                               | -3.6  |
| <b>PA3910</b> |             | Nucleotide biosynthesis and metabolism; Secreted Factors (toxins, enzymes, alginate)              | -7.1  |
| <b>PA3925</b> |             | Putative enzymes                                                                                  | -1.5  |
| <b>PA3990</b> |             | Hypothetical, unclassified, unknown                                                               | -3.0  |
| <b>PA4138</b> | <i>tyrS</i> | Amino acid biosynthesis and metabolism; Translation, post-translational modification, degradation | -2.0  |
| <b>PA4307</b> | <i>pctC</i> | Adaptation, Protection; Chemotaxis                                                                | -2.0  |
| <b>PA4335</b> |             | Hypothetical, unclassified, unknown                                                               | -1.6  |
| <b>PA4350</b> |             | Fatty acid and phospholipid metabolism                                                            | -8.6  |
| <b>PA4351</b> |             | Fatty acid and phospholipid metabolism; Fatty acid and phospholipid metabolism                    | -10.4 |
| <b>PA4443</b> | <i>cysD</i> | Central intermediary metabolism; Amino acid biosynthesis and metabolism                           | -1.5  |
| <b>PA4582</b> |             | Hypothetical, unclassified, unknown                                                               | -1.9  |
| <b>PA4583</b> |             | Hypothetical, unclassified, unknown                                                               | -2.1  |
| <b>PA4635</b> |             | Hypothetical, unclassified, unknown                                                               | -2.4  |
| <b>PA4656</b> |             | Hypothetical, unclassified, unknown                                                               | -1.7  |
| <b>PA4658</b> |             | Hypothetical, unclassified, unknown                                                               | -1.5  |
| <b>PA4821</b> |             | Membrane proteins; Transport of small molecules                                                   | -2.2  |
| <b>PA4822</b> |             | Membrane proteins                                                                                 | -1.6  |

---

---

|               |             |                                                              |      |
|---------------|-------------|--------------------------------------------------------------|------|
| <b>PA4823</b> |             | Hypothetical, unclassified, unknown                          | -1.5 |
| <b>PA4826</b> |             | Hypothetical, unclassified, unknown                          | -1.5 |
| <b>PA4844</b> |             | Adaptation, Protection; Chemotaxis                           | -4.2 |
| <b>PA4985</b> |             | Hypothetical, unclassified, unknown                          | -1.6 |
| <b>PA5082</b> |             | Transport of small molecules                                 | -2.0 |
| <b>PA5297</b> | <i>poxB</i> | Central intermediary metabolism; Energy metabolism           | -1.7 |
| <b>PA5360</b> | <i>phoB</i> | Transcriptional regulators; Two-component regulatory systems | -2.6 |
| <b>PA5361</b> | <i>phoR</i> | Two-component regulatory systems                             | -1.7 |
| <b>PA5365</b> | <i>phoU</i> | Membrane proteins; Transcriptional regulators                | -1.6 |
| <b>PA5366</b> | <i>pstB</i> | Membrane proteins; Transport of small molecules              | -1.8 |
| <b>PA5367</b> | <i>pstA</i> | Membrane proteins; Transport of small molecules              | -2.2 |
| <b>PA5368</b> | <i>pstC</i> | Membrane proteins; Transport of small molecules              | -2.0 |
| <b>PA5369</b> |             | Transport of small molecules                                 | -1.9 |
| <b>PA5389</b> |             | Transcriptional regulators                                   | -1.5 |
| <b>PA5436</b> |             | Central intermediary metabolism                              | -1.6 |

---
